# Supplementary material for: Permanent Recycled Paper – Myth or Truth? Evaluation of Selected Recycled Papers According to the ISO 9706 Standard
Source: publisher site journal article supplement (doi:10.1515/res-2025-0009), 2025-11-28
Supplement: Supplementary file 1 [file j_res-2025-0009_suppl_001.docx]

Permanent recycled paper table and figure captions

Tab. 1 Characterisation of paper samples.

Tab. 2 ISO 9706 measurements of non-treated samples.

Tab. 3 ISO 9706 measurements of wet heat aged samples.

Fig. 1 Tear resistance of paper samples. Highlighted line represents the required threshold value. Error bars represent the standard deviation.

Fig. 2 The folding endurance of paper samples. Error bars represent the standard deviation.

Fig. 3 Total colour difference E of paper samples caused by artificial ageing. Error bars represent the standard deviation.

Fig. 4 Values of L* and b* parameters of paper samples.
